# Supplementary material for: Properties of Neurons Derived from Induced Pluripotent Stem Cells of Gaucher Disease Type 2 Patient Fibroblasts: Potential Role in Neuropathology
Source: PubMed Central journal article supplement (PMC4378893; doi:10.1371/journal.pone.0118771), 2015-03-30
Supplement: pone.0118771.s006.pdf [file pone.0118771.s006.pdf]

# S1 Table

| Table S1. Fibroblast lines from Gaucher disease patient and control human used for iPSC reprogramming |             |              |                                                            |           |                 |        |                                                                                                                                  |                       |                      |                  |
|-------------------------------------------------------------------------------------------------------|-------------|--------------|------------------------------------------------------------|-----------|-----------------|--------|----------------------------------------------------------------------------------------------------------------------------------|-----------------------|----------------------|------------------|
| ID                                                                                                    | Cell source | Diagnosis    | Genotype                                                   | Race      | Age At Sampling | Sex    | Clinical notes                                                                                                                   | iPSC ID (# of clones) | Reprogramming method | References       |
| GM01260                                                                                               | Coriell     | TYPE 2       | L444P/P415R                                                | Caucasian | 11 months       | Female | Splenomegaly; opisthotonus: expired at age 1; 3% of control fibroblast GCCase activity.                                          | iPSC47 (12)           | Lentivirus [42]      | [34,35,37-39,51] |
| GM02627                                                                                               | Coriell     | TYPE 2       | G325R/C342G                                                | Caucasian | 3 years         | Female | Subacute neuropathic Gaucher; myoclonus; seizures; expired at age 3 due to pneumonia; 24% of control fibroblast GCCase activity. | iPSC122 (6)           | Episomal [43]        | [34,35,37,69]    |
| GM08760                                                                                               | Coriell     | TYPE 2       | L444P:E326K / L444P:E326K*                                 | Caucasian | 1 years         | Male   | Hepatosplenomegaly, retroflexion of head, strabismus, dysphagia, and hypertonicity; WBC show defect in GCCase activity.          | iPSC123 (6)           | Episomal [43]        | [38]             |
| GM00877                                                                                               | Coriell     | TYPE 2       | L444P/L444P, 1483G>C and 1497G>C on one allele             | Caucasian | 1 years         | Male   | Hepatosplenomegaly; strabismus; trismus; expired at age 1; 4% of control fibroblast GCCase activity.                             | iPSC126 (6)           | Episomal [43]        | [34-39]          |
| GM20270                                                                                               | Coriell     | TYPE 2       | L444P/IVS2+1G>A                                            | Other     | 4 months        | Female | Clinically affected.                                                                                                             | Failed to reprogram   | Episomal [43]        | [38,70]          |
| GM00878                                                                                               | Coriell     | Heterozygote | carrier for L444P/L444P, 1483G>C and 1497G>C on one allele | Caucasian | Unavailable     | Female | Carrier level of fibroblast GCCase activity; clinically unaffected mother of GM00877.                                            | iPSC127 (6)           | Episomal [43]        | [36,71]          |

|         |             |              |             |           |             |      |                                                                                                                                                                |                               |                 |         |
|---------|-------------|--------------|-------------|-----------|-------------|------|----------------------------------------------------------------------------------------------------------------------------------------------------------------|-------------------------------|-----------------|---------|
| GM20272 | Coriell     | TYPE 2I      | L444P/L444P |           | Unavailable | Male | Clinically affected; hepatosplenomegaly; slowed horizontal saccades.                                                                                           | Fibroblasts did not grow well | not attempted   | [38]    |
| GM01607 | Coriell     | TYPE 1       | N370S/V394L | Caucasian | 30 years    | Male | Eastern European Jewish; hepatosplenomegaly since age 17; typical Gaucher's cells observed in bone marrow aspirant; 18% of control fibroblast GCcase activity. | iPSC67 (4)                    | Lentivirus [42] | [39]    |
| GM00852 | Coriell     | TYPE 1       | N370S/84GG  | Caucasian | 20 years    | Male | Adult; 6% of control fibroblast GCcase activity.                                                                                                               | Failed to reprogram           | Lentivirus [42] | [39,72] |
| HFF10   | CCHMC /PSCF | Normal human |             | n/a       | Newborn     | Male | Clinically unaffected newborn                                                                                                                                  | iPSC54 (3)                    | Lentivirus [42] | [40]    |

\*, Determined in this study.
